# Supplementary material for: Assembly of the largest squamate reference genome to date: The western fence lizard, Sceloporus occidentalis
Source: PubMed Central journal article supplement — J Hered. 2023 Jun 19;114(5):521–8. doi: 10.1093/jhered/esad037 (PMC10445515; doi:10.1093/jhered/esad037), 2023-06-19
Supplement: esad037_suppl_supplementary_material.pdf [file esad037_suppl_supplementary_material.pdf]

Supplementary Material

**Assembly of the largest squamate reference genome to date: the western fence lizard,  
*Sceloporus occidentalis***

Anusha P. Bishop<sup>1,2</sup>, Erin P. Westeen<sup>1,2</sup>, Michael L. Yuan<sup>3</sup>, Merly Escalona<sup>4</sup>, Eric Beraut<sup>5</sup>, Colin Fairbairn<sup>5</sup>, Mohan P. A. Marimuthu<sup>6</sup>, Oanh Nguyen<sup>6</sup>, Noravit Chumchim<sup>6</sup>, Erin Toffelmier<sup>7,8</sup>, Robert N. Fisher<sup>9</sup>, H. Bradley Shaffer<sup>7,8</sup>, and Ian J. Wang<sup>1,2</sup>

***Author affiliation(s):***

<sup>1</sup> Department of Environmental Science, Policy, and Management, University of California, Berkeley, CA 94720, USA

<sup>2</sup> Museum of Vertebrate Zoology, University of California, Berkeley, CA 94720, USA

<sup>3</sup> Center for Population Biology, University of California, Davis, CA 95616, USA

<sup>4</sup> Department of Biomolecular Engineering, University of California Santa Cruz, Santa Cruz, CA 95064, USA.

<sup>5</sup> Department of Ecology and Evolutionary Biology, University of California, Santa Cruz, Santa Cruz, CA 95064, USA

<sup>6</sup> DNA Technologies and Expression Analysis Core Laboratory, Genome Center, University of California, Davis, CA 95616, USA

<sup>7</sup> Department of Ecology and Evolutionary Biology, University of California, Los Angeles, CA 90095, USA

<sup>8</sup> La Kretz Center for California Conservation Science, Institute of the Environment and Sustainability, University of California, Los Angeles, CA 90095, USA

<sup>9</sup> U.S. Geological Survey Western Ecological Research Center, San Diego, CA 92101, USA

***Corresponding author email:*** [ianwang@berkeley.edu](mailto:ianwang@berkeley.edu)

### Scaffold statistics

- Log10 scaffold count (total 1.8k)
- Scaffold length (total 3.2G)
- Longest scaffold (310M)
- N50 length (39M)
- N90 length (930k)

### BUSCO tetrapoda\_odb10 (5310)

- Complete (98.3%)
- Fragmented (0.7%)
- Duplicated (66.4%)
- Missing (1.0%)

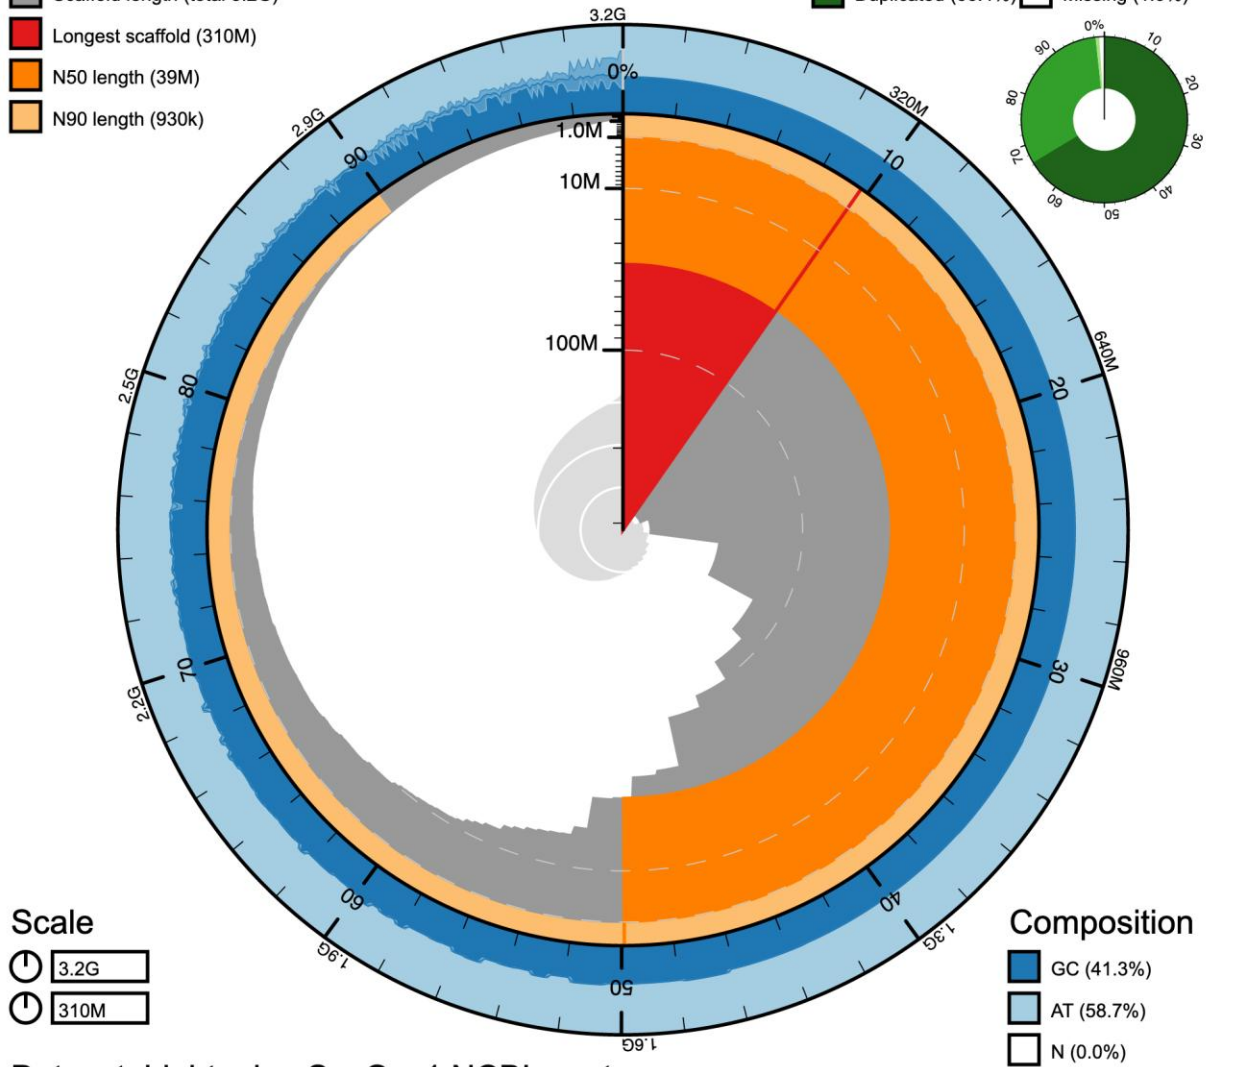

**Supplementary Fig. 1:** BlobToolKit Snail plot showing a graphical representation of the quality metrics for the *S. occidentalis* alternate assembly. The plot circle represents the full size of the assembly. From the inside out, the central plot covers length-related metrics. The red line represents the size of the longest scaffold; all other scaffolds are arranged in size-order moving clockwise around the plot and drawn in gray, starting from the outside of the central plot. Dark and light orange arcs show the scaffold N50 and scaffold N90 values. The central light gray spiral shows the cumulative scaffold count with a white line at each order of magnitude. White regions in this area reflect the proportion of Ns in the assembly; the dark vs. light blue area around it shows mean, maximum, and minimum GC vs. AT content at 0.1% intervals.
